# Supplementary material for: Synthesis of nucleoside 3′,5′-cyclic boranophosphorothioate, a new type of cyclic nucleotide
Source: Royal Society of Chemistry journal article supplement (doi:10.1039/b207350a), 2002-01-01
Supplement: b207350a.doc [file b207350a.doc]

# *Supporting Information*

**Synthesis of nucleoside 3’,5’-cyclic boranophos­phorothioate, a new type of cyclic nucleotide**

## **Ping Li and Barbara Ramsay Shaw***

Department of Chemistry

Paul M. Gross Chemical Lab

Duke University, Box 90346

Durham, North Carolina 27708-0346

[brs@chem.duke.edu](mailto:brs@chem.duke.edu)

***Experimental Section***

All the reactions were carried out under argon. Nucleoside **10** (0.25 mmol, 1 equiv.) was mixed with 40 mL acetonitrile in a 100-mL flask. Argon was bubbled through the mixture for 15 min, and a freshly distilled HMPA (45 mg, 50 L, 0.275 mmol, 1.1 equiv.) was added. The mixture was purged with argon for an additional 10 min. The reaction was slowly heated to 65 0C in 2 h and maintained at 65 0C overnight. Solvent was then removed to give an off-white solid. The solid was redissolved in 30 mL acetonitrile. Recrystallized 4-nitrophenol (35 mg, 0.25 mmol, 1 equiv.) and 5-ethylthio-1*H*-tetrazole (65 mg, 0.5 mmol, 2 equiv.) were added and stirred for 30 min followed by treatment with borane-dimethyl sulfide (76 mg, 95 L, 1 mmol, 4 equiv.) for another 4 h. Solvent was removed and the residue was dissolved in 6 mL anhydrous DMF/dioxane (1:1, v/v) together with Li2S (23 mg, 0.5 mmol) to afford cNMPBS **5** in 2 h. Compounds **5a** and **5b** were isolated by ion-exchange chromatography on a QA-cellulose[HCO3-] column eluted with a linear gradient of 5 - 200 mM NH4HCO3 (pH = 8.00) to afford the ammonium salts.

Ion-exchange chromatography was performed with QA-52 quaternary ammonium cellulose[HCO3-] (Whatman) packed into a 301.5 cm LC column with a volume of 50 ml. The ISCO system consisted of a Tris® peristaltic pump (flow rate = 5.8 ml/min), a UA®-6 absorbance detector (254 nm), and a Retriever® IV fraction collector.

Thymidine 3’,5’-cyclic boranophosphorothioate **5a**: tR = 230 min; yield = 70%.

5-Fluoro-2’-deoxyuridine 3’,5’-cyclic boranophosphorothioate **5b**: tR = 240 min;

yield = 65%.

Separation of *P*-diastereoisomers were carried out by RP-HPLC using the conditions as follows:

Column: Waters Delta Pak C18-100 Å , 15 μ, 25100 mm; Flow rate = 10 ml/min.

Thymidine 3’,5’-cyclic boranophosphorothioate **5a**: eluted with 14% MeOH and 86% 200 mM TEAB (triethylammonium bicarbonate); tR(I) = 19.07 min; tR(II) = 21.23 min.

5-Fluoro-2’-deoxyuridine 3’,5’-cyclic boranophosphorothioate **5b**: eluted with a linear gradient of 5-25% CH3CN and 200 mM TEAB in 45 min; tR(I) = 7.60 min; tR(II) = 9.20 min.

1H, 31P NMR and 19FNMR spectra were recorded on a Varian Inova-400 spectrometer operating at 400.0, 161.9 and 376.2 MHz, respectively. All the compounds were in the form of triethylammonium salts and dissolved in D2O. Phosphoric acid (85%) and fluorotrichloromethane was used as an external standard for 31P NMR and 19F NMR, respectively. MS spectra were recorded on a JEOL-JMS-SX-102 using FAB-MS at 3000 resolution. UV spectra were recorded on a Waters 996 photodiode array detector.

Thymidine 3’,5’-cyclic boranophosphorothioate **5a** (*P*-diastereoisomer I): 1H NMR (D2O) δH 7.28 (q, 1H, H6, J=0.8Hz), 6.10 (dd, 1H, H1’, J=8.4, 3.2Hz), 4.61-4.55 (m, 1H, H3’), 4.41-4.33 (m, 1H, H5’), 4.31-4.24 (m, 1H, H5’’), 3.80-3.75 (m, 1H, H4’), 3.04 (q, 6H, CH2 of NEt3, J=7.2Hz), 2.42-2.35 (m, 2H, H2’, H2’’), 1.74 (d, 3H, 5-Me, J=0.8Hz), 1.12 (t, 9H, CH3 of NEt3, J=7.2Hz), 1.0-0.2 (br, 3H, BH3); 31P NMR (D2O) δP 170.7 (q, 1P, J=102Hz); λmax/nm 265.2

Thymidine 3’,5’-cyclic boranophosphorothioate **5a** (*P*-diastereoisomer II): 1H NMR (D2O) δH 7.34 (q, 1H, H6, J=1.2Hz), 6.11 (dd, 1H, H1’, J=8.8, 2.4Hz), 4.93-4.85 (m, 1H, H3’), 4.53-4.47 (m, 1H, H5’), 4.25-4.17 (m, 1H, H5’’), 3.65-3.59 (m, 1H, H4’), 3.05 (q, 6H, CH2 of NEt3, J=7.2Hz), 2.46-2.30 (m, 2H, H2’, H2’’), 1.75 (d, 3H, 5-Me, J=1.2Hz), 1.12 (t, 9H, CH3 of NEt3, J=7.2Hz), 1.0-0.2 (br, 3H, BH3); 31P NMR (D2O) δP 162.4 (d, 1P, J=115Hz); λmax/nm 265.2

Thymidine 3’,5’-cyclic boranophosphorothioate **5a** (*P*-diastereoisomer mixtures): MS (FAB-): m/z 316.97 (M-); HRMS: Calc. for C10H15BN2O5PS, 317.0532, found, 317.0535

5-Fluoro-2’-deoxyuridine 3’,5’-cyclic boranophosphorothioate **5b** (*P*-diastereoisomer I): 1H NMR (D2O) δH 7.48 (d, 1H, H6, J=6.4Hz), 6.09 (d, 1H, H1’, J=8.4Hz), 4.53-4.47 (m, 1H, H3’), 4.40-4.32 (m, 1H, H5’), 4.31-4.25 (m, 1H, H5’’), 3.78-3.72 (m, 1H, H4’), 2.80 (q, 6H, CH2 of NEt3, J=7.2Hz), 2.44-2.36 (m, 1H, H2’), 2.29-2.24 (m, 1H, H2’’), 1.01 (t, 9H, CH3 of NEt3, J=7.2Hz), 0.9-0.2 (br, 3H, BH3); 31P NMR (D2O) δP 170.6 (q, 1P, J=113Hz); 19F NMR (D2O) δF -163.8 (dd, 1F, J=6.4, 1.6Hz); λmax/nm 267.6

5-Fluoro-2’-deoxyuridine 3’,5’-cyclic boranophosphorothioate **5b** (*P*-diastereoisomer II): 1H NMR (D2O) δH 7.52 (d, 1H, H6, J=6.0Hz), 6.08 (d, 1H, H1’, J=8.4Hz), 4.86-4.78 (m, 1H, H3’), 4.53-4.47 (m, 1H, H5’), 4.23-4.15 (m, 1H, H5’’), 3.62-3.56 (m, 1H, H4’), 2.83 (q, 6H, CH2 of NEt3, J=7.2Hz), 2.43-2.35 (m, 1H, H2’), 2.26-2.21 (m, 1H, H2’’), 1.02 (t, 9H, CH3 of NEt3, J=7.2Hz), 1.0-0.1 (br, 3H, BH3); 31P NMR (D2O) δP 162.3 (d, 1P, J=130Hz); 19F NMR (D2O) δF -163.7 (d, 1F, J=6.0Hz); λmax/nm 267.6

5-Fluoro-2’-deoxyuridine 3’,5’-cyclic boranophosphorothioate **5b** (*P*-diastereoisomer mixtures): MS (FAB-): m/z 321.16 (M-); HRMS: Calc. for C9H12BFN2O5PS, 321.0282, found, 320.0221
